# Supplementary material for: Self-assembly of biodegradable copolyester and reactive HPMA-based polymers into nanoparticles as an alternative stealth drug delivery system
Source: Royal Society of Chemistry journal article supplement (doi:10.1039/c2sm26150b), 2012-01-01
Supplement: c2sm26150b.pdf [file c2sm26150b.pdf]

Supporting Information for the Manuscript Entitled

# Self-assembly of Biodegradable Copolyester and Reactive HPMA-based Polymers into Nanoparticles as an Alternative Stealth Drug Delivery System

Eliézer Jäger,<sup>†,\*</sup> Alessandro Jäger,<sup>†</sup> Tomáš Etrych,<sup>†</sup> Fernando Carlos Giacomelli,<sup>‡</sup>

Petr Chytil,<sup>†</sup> Alexander Jigounov,<sup>†</sup> Jean-Luc Putaux,<sup>§</sup> Blanka Říhová,<sup>£</sup>

Karel Ulbrich,<sup>†</sup> and Petr Štěpánek<sup>†,\*</sup>

<sup>†</sup> Institute of Macromolecular Chemistry v.v.i., Academy of Sciences of the Czech Republic, Heyrovsky Sq. 2, 162 06 Prague 6, Czech Republic.

<sup>‡</sup> Centro de Ciências Naturais e Humanas, Universidade Federal do ABC, 09210-170 Santo André, Brazil.

<sup>§</sup> Centre de Recherches sur les Macromolécules Végétales (CERMAV-CNRS), BP 53, 38041 Grenoble Cedex 9, France - affiliated with Joseph Fourier University and member of the Institut de Chimie Moléculaire de Grenoble.

<sup>£</sup> Institute of Microbiology v.v.i., Academy of Sciences of the Czech Republic, Vídenska 1083, 142 20 Prague 4, Czech Republic.

Corresponding Authors: [jager@imc.cas.cz](mailto:jager@imc.cas.cz)

Tel: +420 296 809 322

[stepanek@imc.cas.cz](mailto:stepanek@imc.cas.cz)

Tel: +420 296 809 211

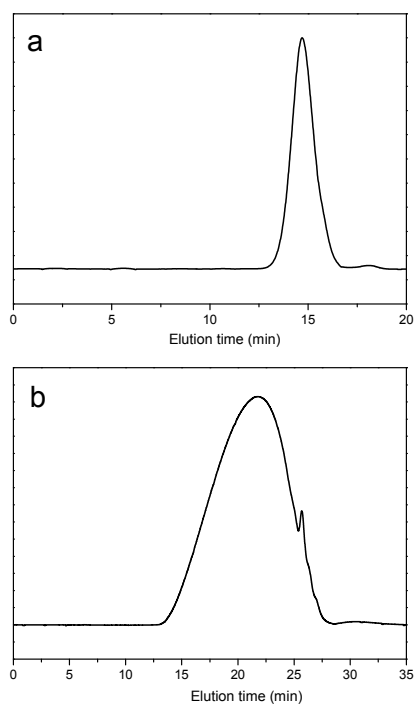

**Figure S1.** SEC chromatograms for PBS/PBDL (a) and HPMA-chol (b).

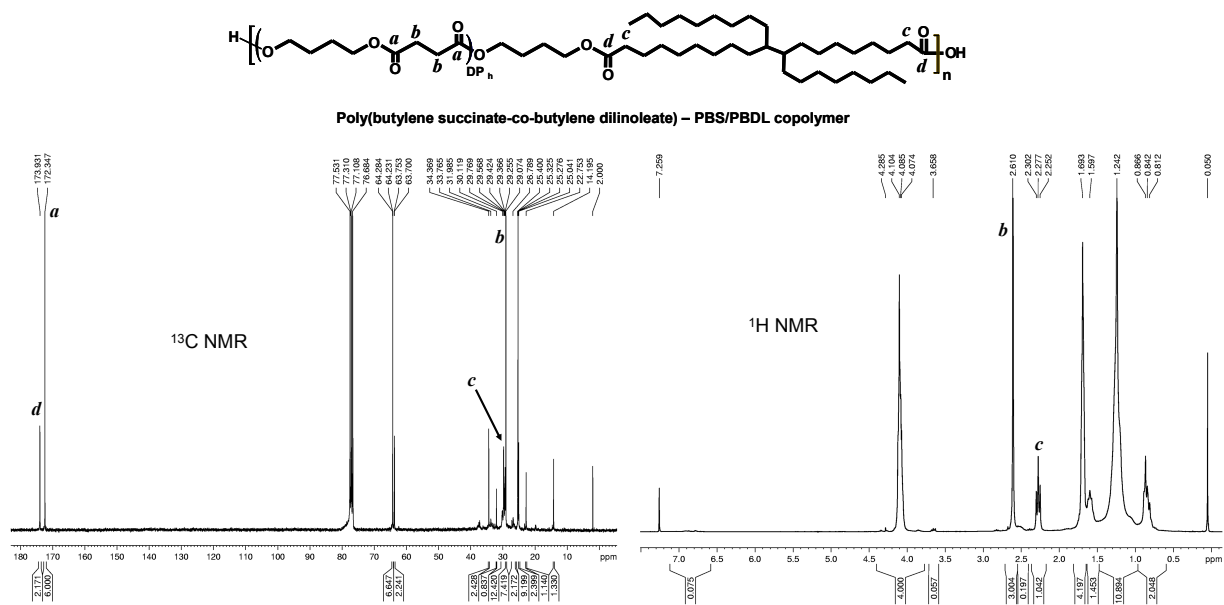

**Figure S2.**  $^1\text{H}$  and  $^{13}\text{C}$  NMR of the poly(butylene succinate-co-butylene dilinoleate) aliphatic copolyester.

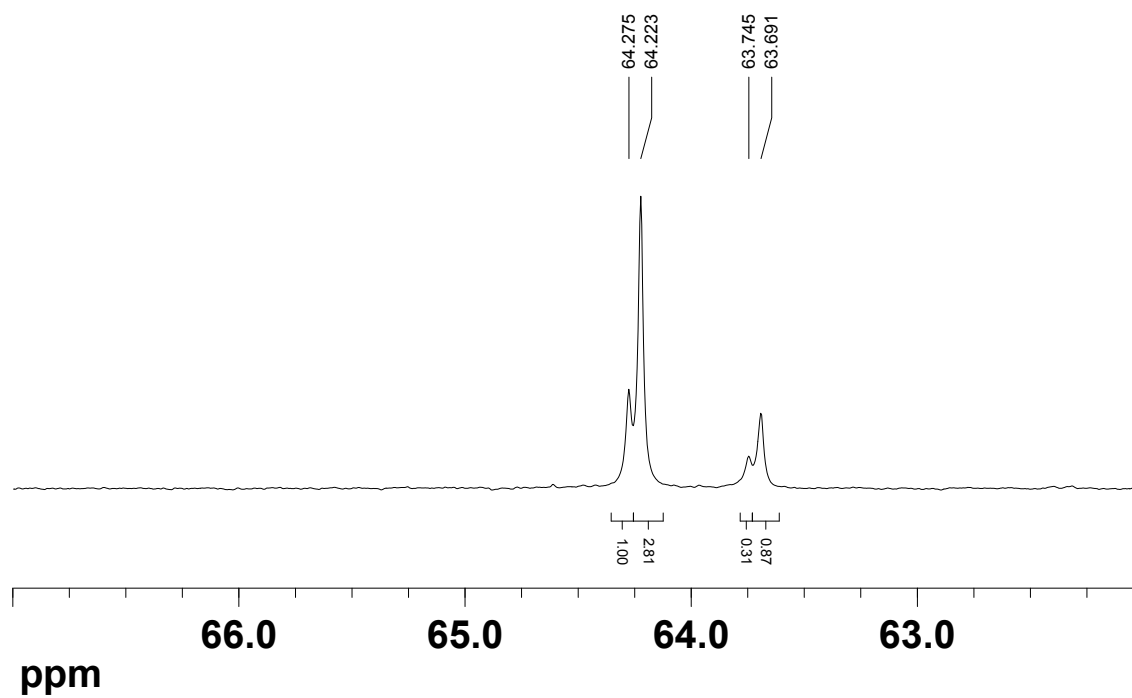

**Figure S3.** PBS/PBDL  $^{13}\text{C}$  NMR spectra showing the divide of carbonyl groups (C=O) around 64 ppm.

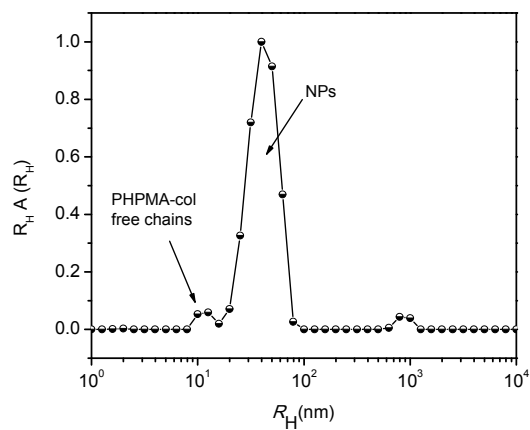

**Figure S4.** Distribution of  $R_H$  as revealed by REPES algorithm from the autocorrelation function  $g_2(t)$  measured at  $90^\circ$  for NP1:2.5 in water.
